# Supplementary material for: Effect of pH/metal ion on the structure of metal–organic frameworks based on novel bifunctionalized ligand 4′-carboxy-4,2′:6′,4′′-terpyridine
Source: Royal Society of Chemistry journal article supplement (doi:10.1039/c2ce26171e), 2012-11-13
Supplement: c2ce26171e.pdf [file c2ce26171e.pdf]

# **Effect of pH/metal ion on the structure of metal-organic frameworks based on novel bifunctionalized ligand 4'-carboxy-4,2':6',4''-terpyridine**

Fei Yuan, Juan Xie, Huai-Ming Hu\*, Chun-Mei Yuan, Bing Xu, Meng-Lin Yang, Fa-Xin Dong, Gang-Lin Xue

Key Laboratory of Synthetic and Natural Functional Molecule Chemistry of Ministry of Education, College of Chemistry and Materials Science, Northwest University, Xi'an 710069, China

Corresponding Author: Huai-Ming Hu.

Tel/Fax: 0086-29-88303331.

Email address: [Chemhu1@nwu.edu.cn](mailto:Chemhu1@nwu.edu.cn)

**Table 1S** Selected bond distances and bond angles (Å, °)

| <b>Compound 1</b>   |            |                     |            |
|---------------------|------------|---------------------|------------|
| Cd(1)-O(3)          | 2.226(3)   | N(4)-C(17)          | 1.325(5)   |
| Cd(1)-N(3)#1        | 2.301(3)   | N(4)-C(21)          | 1.341(5)   |
| Cd(1)-N(1)          | 2.377(3)   | N(4)-Cd(1)#5        | 2.390(3)   |
| Cd(1)-O(1)#2        | 2.384(3)   | N(5)-C(26)          | 1.330(4)   |
| Cd(1)-N(4)#3        | 2.390(3)   | N(5)-C(22)          | 1.338(4)   |
| Cd(1)-O(2)#2        | 2.490(2)   | N(6)-C(31)          | 1.318(7)   |
| Cd(1)-C(16)#2       | 2.751(4)   | N(6)-C(27)          | 1.322(7)   |
| N(1)-C(5)           | 1.331(4)   | O(1)-C(16)          | 1.245(4)   |
| N(1)-C(1)           | 1.346(4)   | O(1)-Cd(1)#6        | 2.384(3)   |
| N(2)-C(10)          | 1.337(4)   | O(2)-C(16)          | 1.243(4)   |
| N(2)-C(6)           | 1.344(4)   | O(2)-Cd(1)#6        | 2.490(2)   |
| N(3)-C(11)          | 1.332(4)   | O(3)-C(32)          | 1.262(5)   |
| N(3)-C(15)          | 1.336(4)   | O(4)-C(32)          | 1.215(5)   |
| O(3)-Cd(1)-N(3)#1   | 128.93(11) | N(1)-Cd(1)-N(4)#3   | 157.00(10) |
| O(3)-Cd(1)-N(1)     | 84.90(11)  | O(1)#2-Cd(1)-N(4)#3 | 81.85(12)  |
| N(3)#1-Cd(1)-N(1)   | 98.61(10)  | O(3)-Cd(1)-O(2)#2   | 96.14(10)  |
| O(3)-Cd(1)-O(1)#2   | 146.24(10) | N(3)#1-Cd(1)-O(2)#2 | 134.67(10) |
| N(3)#1-Cd(1)-O(1)#2 | 83.49(9)   | N(1)-Cd(1)-O(2)#2   | 78.59(9)   |
| N(1)-Cd(1)-O(1)#2   | 100.84(11) | O(1)#2-Cd(1)-O(2)#2 | 53.57(8)   |
| O(3)-Cd(1)-N(4)#3   | 80.83(11)  | N(4)#3-Cd(1)-O(2)#2 | 85.08(10)  |
| N(3)#1-Cd(1)-N(4)#3 | 104.39(10) |                     |            |
| <b>Compound 2</b>   |            |                     |            |
| Cd(1)-O(1)          | 2.2614(18) | N(2)-C(10)          | 1.342(3)   |
| Cd(1)-O(4)#1        | 2.2720(18) | N(3)-C(11)          | 1.340(3)   |
| Cd(1)-O(3)          | 2.2790(18) | N(3)-C(15)          | 1.343(3)   |
| Cd(1)-N(3)#2        | 2.308(2)   | N(3)-Cd(1)#5        | 2.308(2)   |
| Cd(1)-O(2)#3        | 2.350(2)   | O(1)-C(16)          | 1.255(3)   |

|                     |            |                     |            |
|---------------------|------------|---------------------|------------|
| Cd(1)-N(1)#4        | 2.399(2)   | O(2)-C(16)          | 1.237(3)   |
| N(1)-C(1)           | 1.338(3)   | O(2)-Cd(1)#3        | 2.350(2)   |
| N(1)-C(5)           | 1.338(4)   | O(3)-C(17)          | 1.249(3)   |
| N(1)-Cd(1)#4        | 2.399(2)   | O(4)-C(17)          | 1.250(3)   |
| N(2)-C(6)           | 1.337(3)   | O(4)-Cd(1)#1        | 2.2720(18) |
| O(1)-Cd(1)-O(4)#1   | 157.44(7)  | O(3)-Cd(1)-O(2)#3   | 85.35(8)   |
| O(1)-Cd(1)-O(3)     | 83.98(7)   | N(3)#2-Cd(1)-O(2)#3 | 94.42(8)   |
| O(4)#1-Cd(1)-O(3)   | 73.78(6)   | O(1)-Cd(1)-N(1)#4   | 87.64(7)   |
| O(1)-Cd(1)-N(3)#2   | 86.91(8)   | O(4)#1-Cd(1)-N(1)#4 | 87.23(7)   |
| O(4)#1-Cd(1)-N(3)#2 | 115.47(7)  | O(3)-Cd(1)-N(1)#4   | 86.47(8)   |
| O(3)-Cd(1)-N(3)#2   | 170.48(7)  | N(3)#2-Cd(1)-N(1)#4 | 95.93(8)   |
| O(1)-Cd(1)-O(2)#3   | 105.32(7)  | O(2)#3-Cd(1)-N(1)#4 | 163.83(8)  |
| O(4)#1-Cd(1)-O(2)#3 | 77.10(7)   |                     |            |
| <b>Compound 3</b>   |            |                     |            |
| Zn(1)-N(1)#1        | 2.073(3)   | N(3)-C(11)          | 1.340(5)   |
| Zn(1)-O(4)          | 2.096(3)   | N(3)-C(15)          | 1.344(5)   |
| Zn(1)-N(3)#2        | 2.120(3)   | N(3)-Zn(1)#4        | 2.120(3)   |
| Zn(1)-O(2)          | 2.154(3)   | O(1)-C(16)          | 1.241(6)   |
| Zn(1)-O(1)          | 2.260(4)   | O(2)-C(16)          | 1.253(5)   |
| N(1)-Zn(1)#3        | 2.073(3)   | O(3)-C(17)          | 1.241(4)   |
| N(2)-C(6)           | 1.334(5)   | O(4)-C(18)          | 1.254(4)   |
| N(2)-C(10)          | 1.348(5)   |                     |            |
| N(1)#1-Zn(1)-O(4)   | 103.12(13) | O(3)-Zn(1)-O(2)     | 88.33(12)  |
| N(1)#1-Zn(1)-O(3)   | 92.16(13)  | N(3)#2-Zn(1)-O(2)   | 101.12(13) |
| N(1)#1-Zn(1)-N(3)#2 | 96.28(13)  | N(1)#1-Zn(1)-O(1)   | 158.15(13) |
| O(4)-Zn(1)-N(3)#2   | 88.11(12)  | O(4)-Zn(1)-O(1)     | 98.33(12)  |
| O(3)-Zn(1)-N(3)#2   | 166.21(12) | O(3)-Zn(1)-O(1)     | 87.73(13)  |
| N(1)#1-Zn(1)-O(2)   | 98.52(12)  | N(3)#2-Zn(1)-O(1)   | 88.45(13)  |
| O(4)-Zn(1)-O(2)     | 155.38(12) | O(2)-Zn(1)-O(1)     | 59.63(11)  |

| <b>Compound 4</b>   |            |                   |            |
|---------------------|------------|-------------------|------------|
| Cu(1)-O(1)#1        | 1.941(2)   | N(3)-C(15)        | 1.330(4)   |
| Cu(1)-O(4)#2        | 1.989(2)   | N(3)-C(11)        | 1.341(4)   |
| Cu(1)-O(3)          | 2.000(2)   | N(3)-Cu(1)#4      | 2.011(3)   |
| Cu(1)-N(3)#3        | 2.011(3)   | O(1)-C(16)        | 1.280(4)   |
| Cu(1)-N(1)          | 2.307(3)   | O(1)-Cu(1)#1      | 1.941(2)   |
| N(1)-C(1)           | 1.329(4)   | O(2)-C(16)        | 1.221(4)   |
| N(1)-C(5)           | 1.338(4)   | O(3)-C(17)        | 1.252(4)   |
| N(2)-C(6)           | 1.338(4)   | O(4)-C(17)        | 1.255(4)   |
| N(2)-C(10)          | 1.346(4)   | O(4)-Cu(1)#2      | 1.989(2)   |
| O(1)#1-Cu(1)-O(4)#2 | 171.03(10) | O(3)-Cu(1)-N(3)#3 | 165.21(11) |
| O(1)#1-Cu(1)-O(3)   | 88.41(10)  | O(1)#1-Cu(1)-N(1) | 90.53(10)  |
| O(4)#2-Cu(1)-O(3)   | 83.67(9)   | O(4)#2-Cu(1)-N(1) | 94.44(10)  |
| O(1)#1-Cu(1)-N(3)#3 | 92.06(10)  | O(3)-Cu(1)-N(1)   | 95.75(10)  |
| O(4)#2-Cu(1)-N(3)#3 | 94.52(10)  | N(3)#3-Cu(1)-N(1) | 99.03(11)  |

Symmetry codes

for **1**: #1 (x, -y+1, z-1/2); #2 (-x+5/2, y+1/2, z); #3 (-x+3/2, y+1/2, z);

#4 (x, -y+1, z+1/2); #5 (-x+3/2, y-1/2, z); #6 (-x+5/2, y-1/2, z).

for **2**: #1 (-x, -y+2, -z+1); #2 (-x+2, y+1/2, -z+3/2); #3 (-x+1, -y+2, -z+1);

#4 (-x+1, -y+2, -z+2); #5 (-x+2, y-1/2, -z+3/2).

for **3**: #1 (x, y, z-1); #2 (x+1/2, -y+1/2, z); #3 (x, y, z+1);

#4 (x-1/2, -y+1/2, z); #5 (x, -y, z).

for **4**: #1 (-x, y-1/2, -z+3/2); #2 (-x+1, -y, -z+1); #3 (-x+2, -y, -z+2);

#4 (-x, y+1/2, -z+3/2).

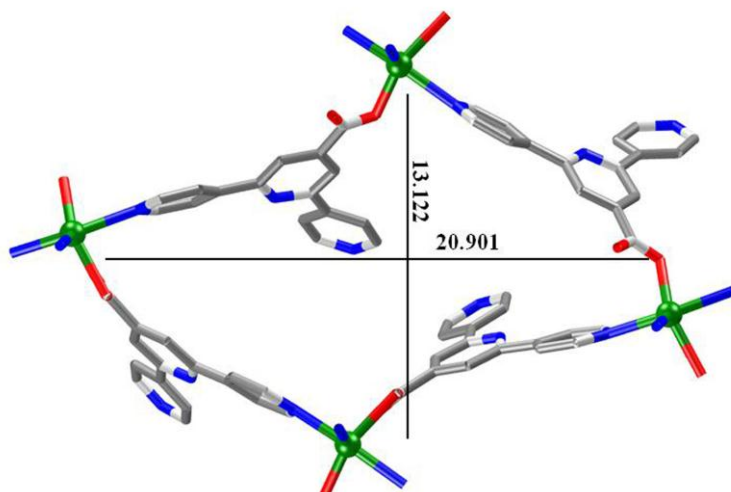

**Fig. S1.** a single unit square grid of **1**.

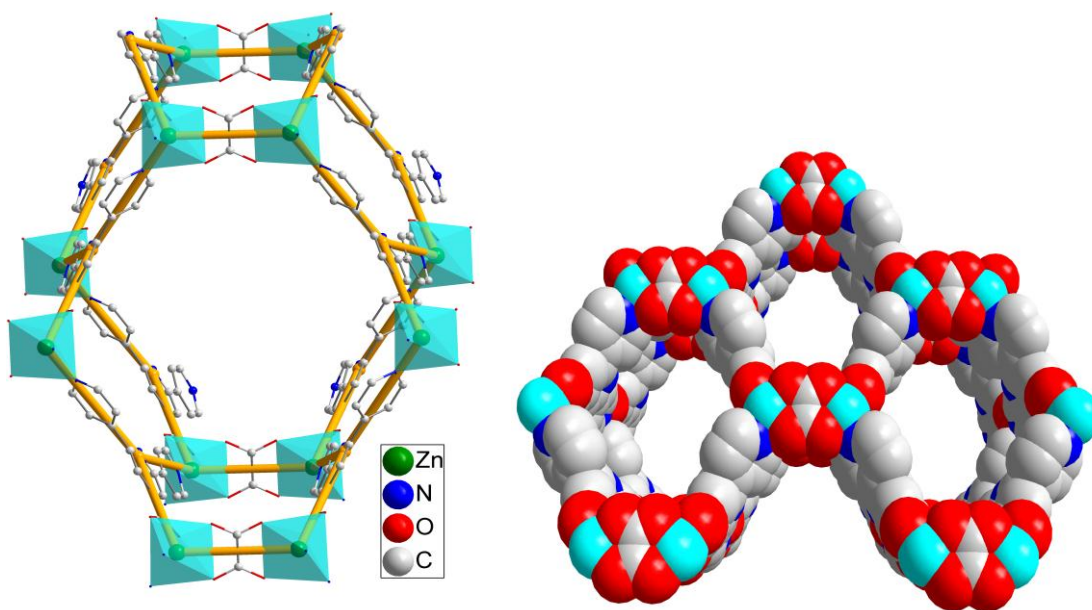

**Fig. S2.** Left: a single **fsc** unit cage of **3**. Right: the space filling mode of a single 3D **fsc** net in **3** (gray: C; blue: N; red: O; turquoise: Zn).

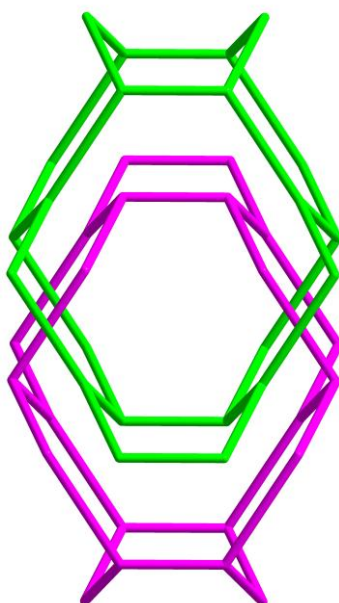

**Fig. S3.** topological representation of the 2-fold interpenetrating network of **3** (each color represents a network).

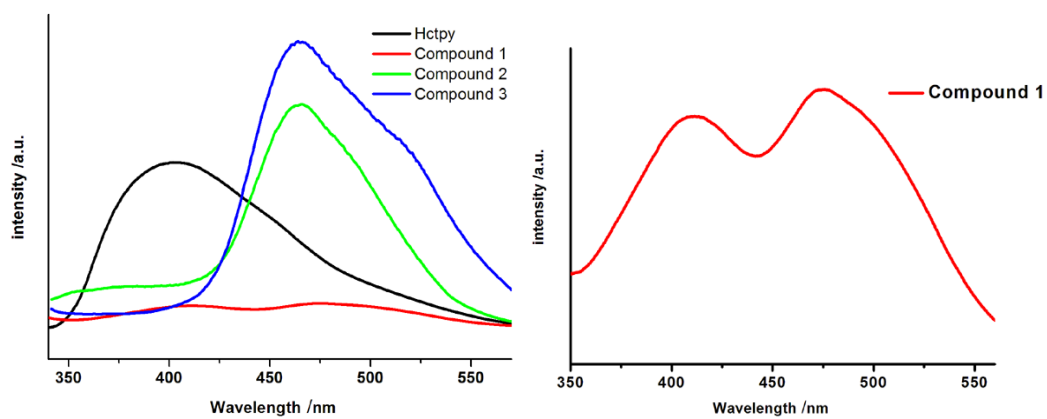

**Fig. S4.** The emission spectra of **Hctpy** and **1-3** in the solid state at room temperature.

(a)

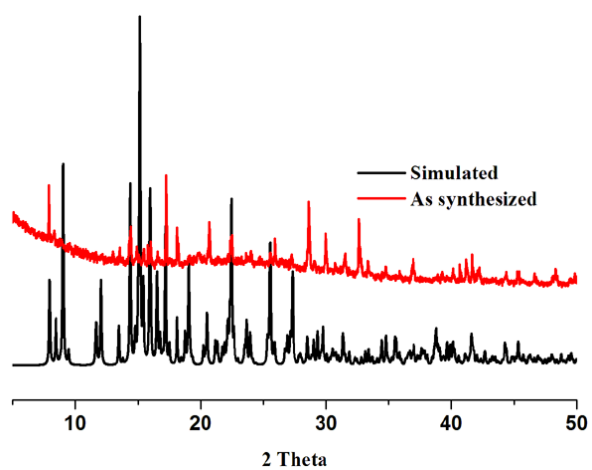

(b)

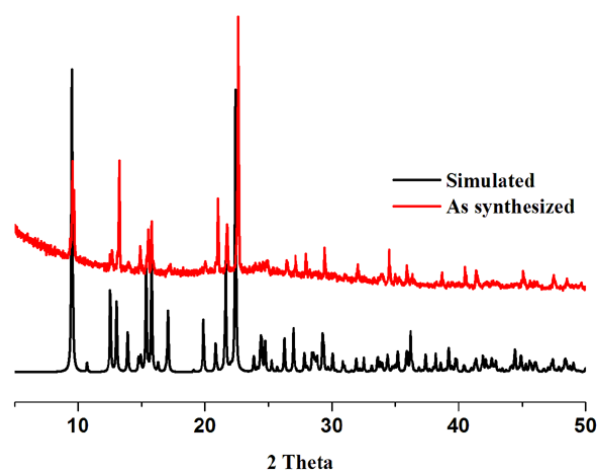

(c)

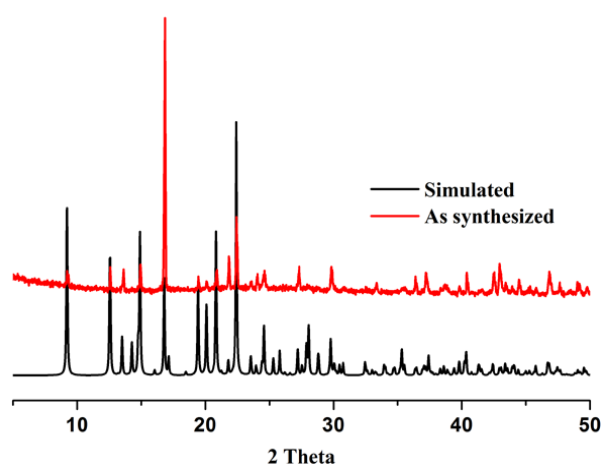

(d)

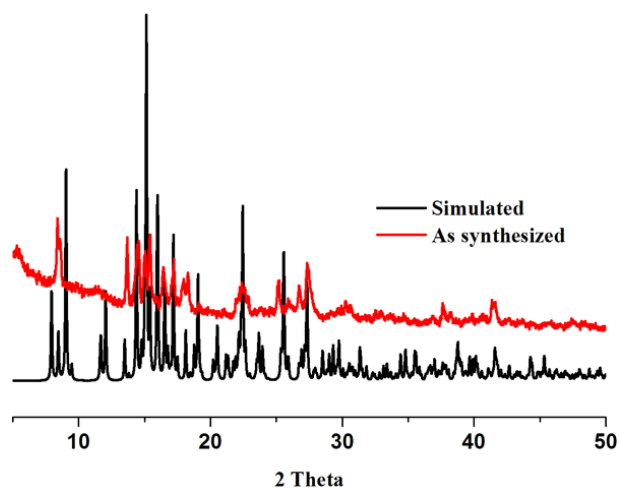

**Fig. S5.** PXRD patterns of compounds **1**, **2**, **4** and white powder (a-d) simulated from the X-ray single-crystal structure and as-synthesized.

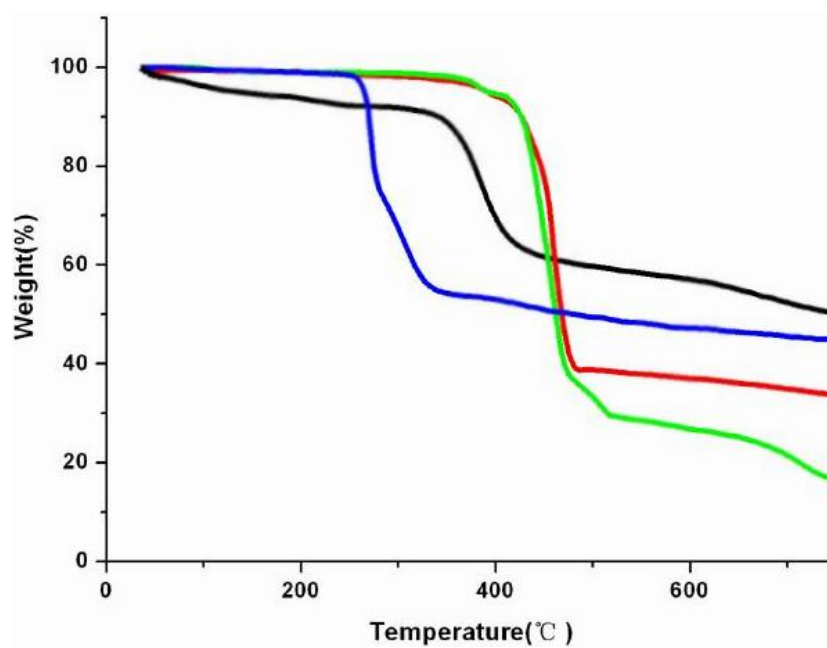

**Fig. S6.** TGA curves for **1-4** (red: **1**; green: **2**; black: **3**; blue: **4**) .



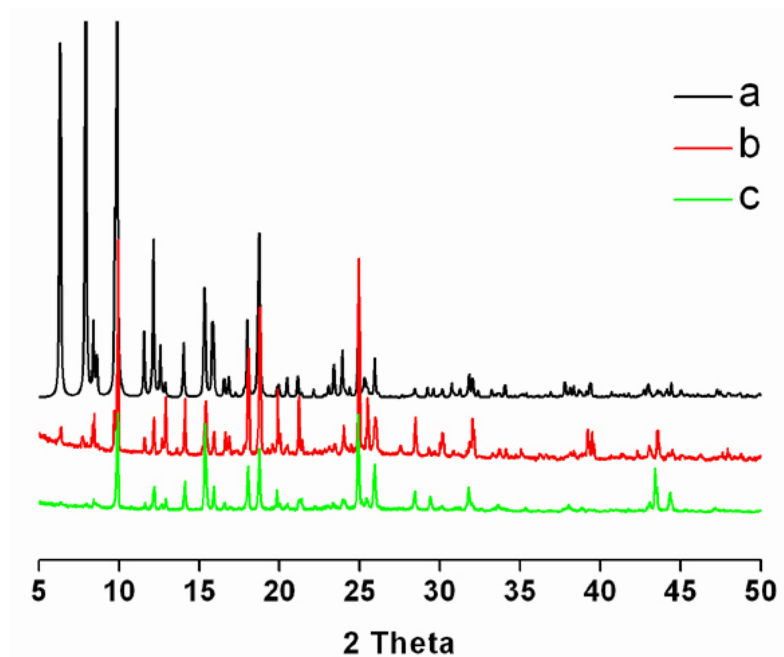

**Fig. S7.** PXRD patterns for **3**: (a) simulated from the single crystal data; (b) synthesized powder samples; (c) dehydrated samples.

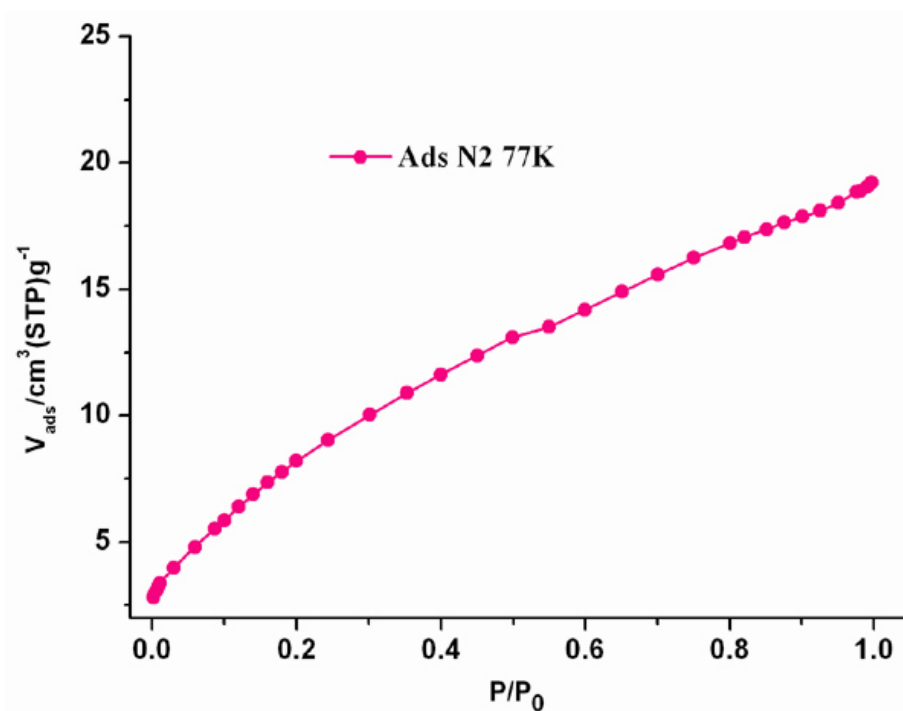

**Fig. S8.** N<sub>2</sub> adsorption isotherm (77 K) of **3a** (activated at 140 °C).
